# Supplementary material for: Multifunctional hyperbranched polymers for CT/19F MRI bimodal molecular imaging
Source: Royal Society of Chemistry journal article supplement (doi:10.1039/c5py01707f), 2015-12-02
Supplement: c5py01707f1.pdf [file c5py01707f1.pdf]

## Supplementary Information

### Multifunctional Hyperbranched Polymers for CT/<sup>19</sup>F MRI

#### Bimodal Molecular Imaging

Kewei Wang, Hui Peng, Kristofer J. Thurecht, Simon Puttick and Andrew K. Whittaker\*

Australian Institute for Bioengineering and Nanotechnology; Centre for Advanced Imaging; ARC Centre of Excellence in Convergent Bio-Nano Science and Technology, The University of Queensland, St. Lucia, Queensland 4072, Australia

E-mail: a.whittaker@uq.edu.au; Fax: +61-7-33463973; Tel: +61-7-33463885

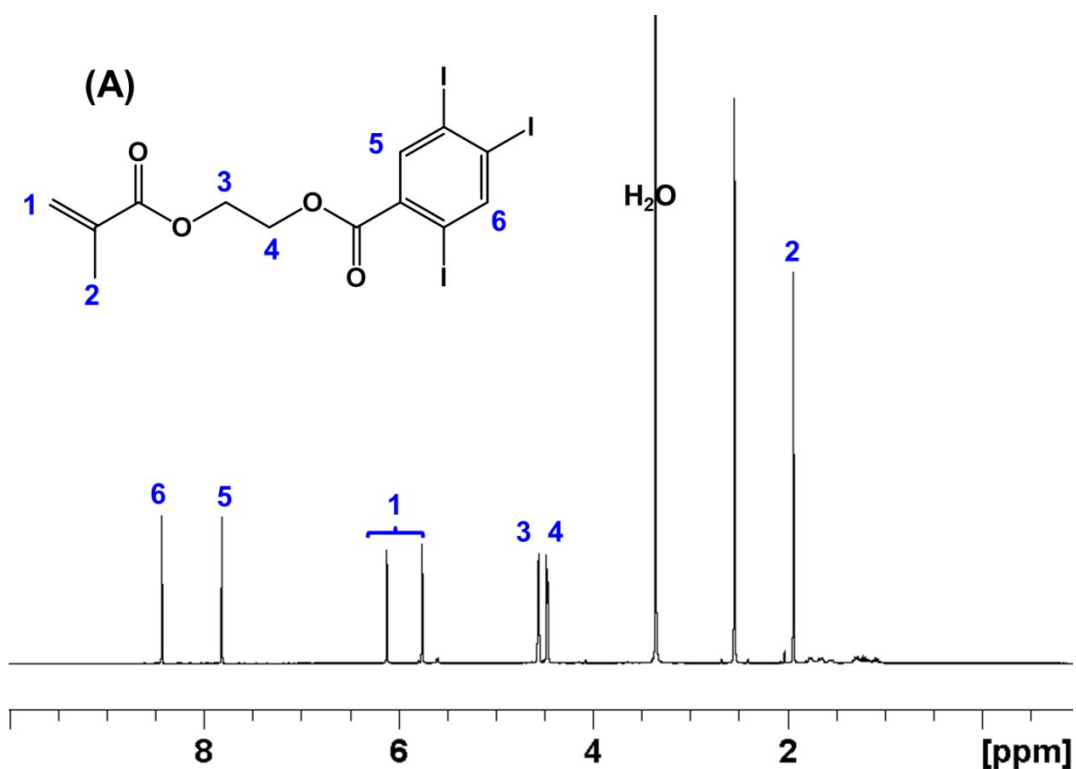

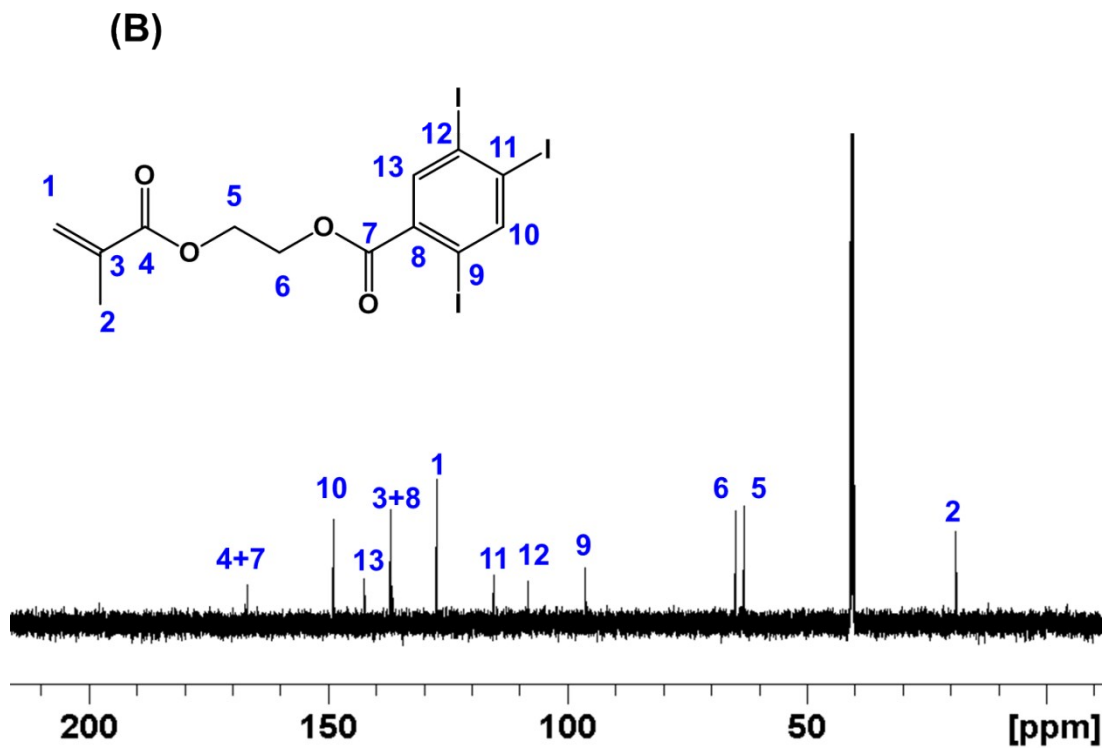

Fig. S1.  $^1\text{H}$  and  $^{13}\text{C}$  NMR spectra of the iodo-monomer TIBMA in  $\text{DMSO-d}_6$  at 25 °C.

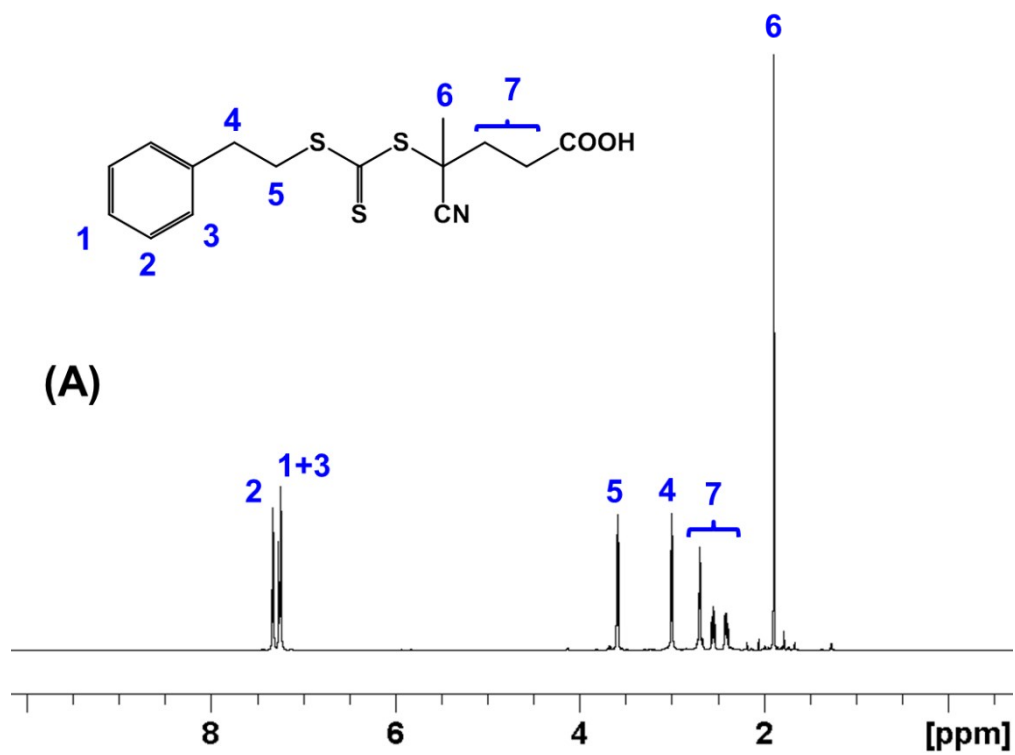

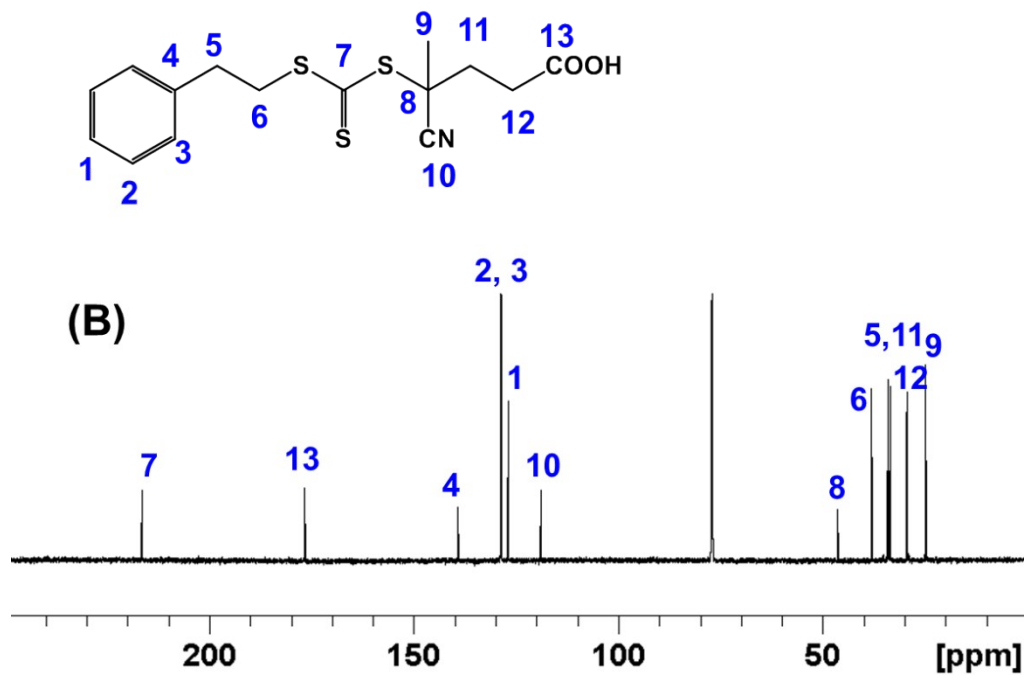

Fig. S2. <sup>1</sup>H NMR (A) and <sup>13</sup>C NMR (B) spectra of the RAFT agent PETTC in CDCl<sub>3</sub> at 25 °C.
